# Supplementary material
Source: HighWire-hosted journal article supplement (https://cmaj.ca/highwire/filestream/57941/field_highwire_adjunct_files/0/image-chat-appendix_1.pdf)
Supplement: image-chat-appendix_1.pdf [file image-chat-appendix_1.pdf]

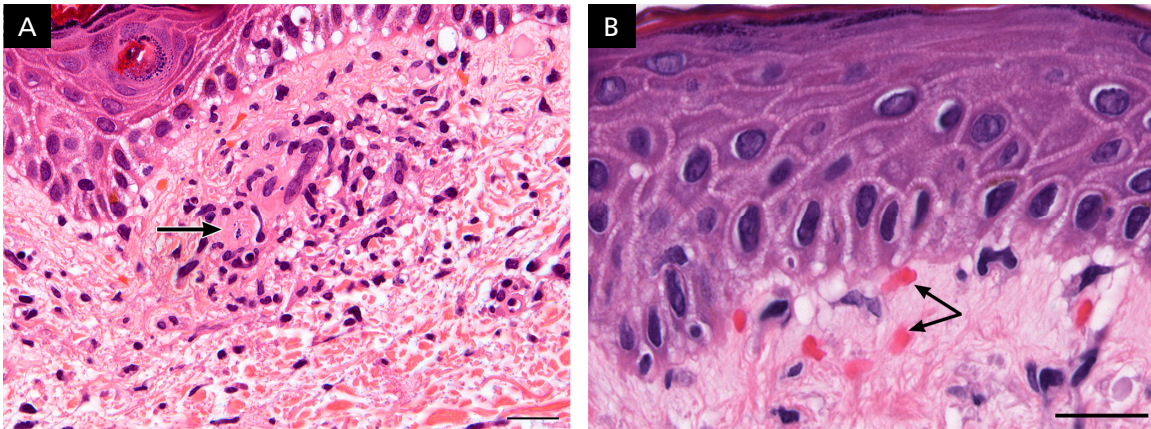

**Appendix 1:** (A) Skin biopsy showing superficial perivascular lymphocytic infiltrate (arrow shows blood vessel) (magnification X 40 with 20  $\mu$  scale). (B) Skin biopsy showing extravasated erythrocytes (arrows) in the papillary dermis (magnification X 50 with 20  $\mu$  scale).
